# Supplementary material
Source: publisher figshare collection journal article supplement (https://acs.figshare.com/ndownloader/files/13633628)
Supplement: Supplementary file 1 [file 13633628]

## **Supporting information**

### **Platelet-mimic uPA delivery nanovectors based on Au rods for thrombus targeting and treatment**

Ting Yang, Xingwei Ding,\* Lina Dong, Can Hong, Jing Ye, Yunfei Xiao, Xiaolei

Wang, Hongbo Xin

#### **Content**

- 1. Figure S1: Heating curves of PM@AuNRs at a power density of 2 W/cm<sup>2</sup>.**
- 2. Figure S2: Zeta potential of PM@AuNRs treated with NIR laser irradiation.**

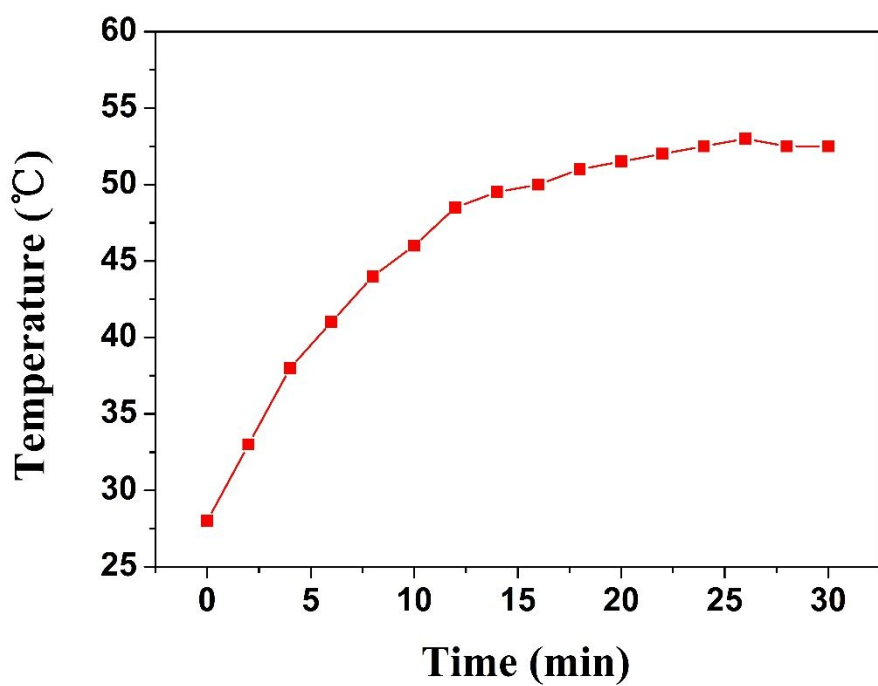

Figure S1. Heating curves of PM@AuNRs at a power density of 2 W/cm<sup>2</sup>

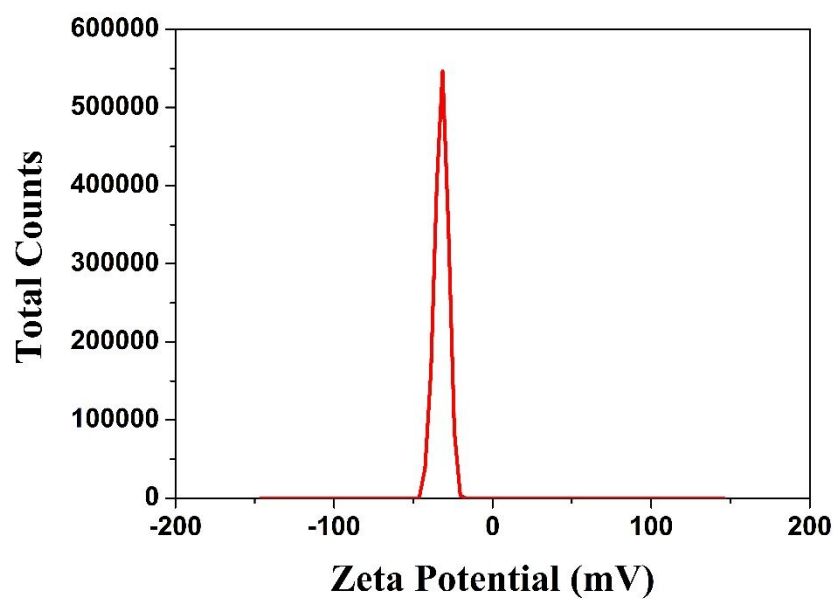

Figure S2. Zeta potential of PM@AuNRs treated with NIR laser irradiation
